32 (BAAI).

### 33 **Abstract**

34        Extensive training improves our ability to perceive visual contents around us, a  
35 phenomenon known as visual perceptual learning (VPL). Numerous studies have been  
36 conducted to understand the mechanisms of VPL, while the neural oscillatory  
37 mechanisms underpinning VPL has yet to be elucidated. To this end, we adopted  
38 transcranial alternating current stimulation (tACS), a neuromodulatory technique that  
39 can alter ongoing brain rhythms in a frequency-specific manner by applying external  
40 weak electric fields, to stimulate targeted cortical areas in human subjects while they  
41 performed an orientation discrimination learning task. Five groups of subjects  
42 undertook five daily training sessions to execute the task. Four groups received  
43 occipital tACS stimulation at 10 Hz (alpha band), 20 Hz (beta band), 40 Hz (gamma  
44 band), or sham 10 Hz (sham), and one group was stimulated at the sensorimotor  
45 regions by 10 Hz tACS. Compared with the sham stimulation, occipital tACS at 10  
46 Hz, but not at 20 Hz or 40 Hz, increased both the learning rate and performance  
47 improvement. However, when 10 Hz tACS was delivered to the sensorimotor areas,  
48 the modulatory effects of tACS were absent, suggesting that tACS modulated the  
49 orientation discrimination learning in a frequency- and location-specific manner.  
50 Moreover, the tACS-induced enhancement lasted at least two months after the  
51 termination of training. Our findings provide strong evidence for the causal role of  
52 alpha oscillations in VPL and shed new light on the design of effective  
53 neuromodulation protocols that might facilitate rehabilitation for patients with  
54 neuro-ophthalmological disorders.

55

56 **Significance Statement**

57 Performance of visual tasks can be enhanced substantially by training, which is  
58 known as visual perceptual learning (VPL). However, little is known about the neural  
59 oscillatory mechanisms underlying VPL. To probe the causal link between a given  
60 oscillatory frequency band and VPL, transcranial alternating current stimulation  
61 (tACS) was applied while subjects performed an orientation discrimination learning  
62 task. Our results revealed that tACS modulates VPL in a frequency- and  
63 location-specific manner. Specifically, only training coupled with 10 Hz tACS over  
64 the occipital cortex speeded up the learning process and amplified the performance  
65 gain. Our findings demonstrate the causal role of alpha oscillations in VPL, and  
66 provide insight into developing more effective and efficient remediation protocols for  
67 clinical applications, e.g., amblyopia.

68

69 **Keywords:** perceptual learning, non-invasive brain stimulation, tACS, alpha  
70 oscillations, visual plasticity, orientation

71

## 72 **Introduction**

73 Repetitive visual experience or practice results in a dramatic and long-lasting  
74 improvement in perceiving visual contents, which is referred to as visual perceptual  
75 learning (VPL) (Maniglia & Seitz, 2018; Watanabe & Sasaki, 2015). VPL is usually  
76 viewed as a manifestation of experience-dependent neural plasticity in human brain  
77 (Lu *et al.*, 2021). Numerous studies have been conducted to explore the neural  
78 substrates of VPL. It has been suggested that VPL occurs at multiple loci in the brain,  
79 from subcortical nuclei to high-level cortical areas involved in decision-making or  
80 attention (Bi *et al.*, 2014; Gold *et al.*, 2008; Mayhew *et al.*, 2012; Mukai *et al.*, 2007;  
81 Sanayei *et al.*, 2018; Yu *et al.*, 2016), and is manifested in various forms, such as  
82 enhanced neural response (Furmanski *et al.*, 2004; Hua *et al.*, 2010), refined neural  
83 representation (Chen *et al.*, 2016; Jehee *et al.*, 2012), sharpened tuning curve  
84 (Schoups *et al.*, 2001; Yang & Maunsell, 2004), channel reweighting from sensory  
85 inputs to decision units (Chen *et al.*, 2015; Doshier & Lu, 1998; Law & Gold, 2008;  
86 Yin Yan *et al.*, 2014).

87 Neural oscillations, characterized by rhythmic changes in neural activity in a  
88 wide range of frequencies, play a critical role in cognitive functioning (Buzsaki &  
89 Draguhn, 2004; Thut *et al.*, 2012). Aberrant neural oscillations might be associated  
90 with some neurological and psychiatric disorders (Schnitzler & Gross, 2005).  
91 However, the neural oscillatory mechanisms of VPL remain poorly understood and  
92 controversial. To date, only sparse studies have explored the neural oscillatory  
93 mechanisms of VPL, and results of these studies are not consistent. The focus of these  
94 studies is whether alpha- and/or gamma-band oscillations are associated with VPL.  
95 Human electroencephalogram (EEG) studies found that there was increased alpha  
96 power in parietal-occipital areas after training on visual tasks, such as visual search

97 (Bays *et al.*, 2015), perceptual grouping (Nikolaev *et al.*, 2016), and orientation  
98 categorization (Muller-Gass *et al.*, 2017). Pre-training resting-state alpha power could  
99 predict one's learning performance (Muller-Gass *et al.*, 2017). On the other hand,  
100 some studies showed that training induced an increase in gamma power (Gruber *et al.*,  
101 2001; Gruber *et al.*, 2002; La Rocca *et al.*, 2020), or changes in both alpha and  
102 gamma power (Hamame *et al.*, 2011). In these studies, oscillatory neural activity was  
103 recorded before and after training, but was not manipulated during training to  
104 modulate VPL, which could not reveal the causal link between neural oscillations and  
105 VPL.

106 Transcranial alternating current stimulation (tACS) is a neuromodulation  
107 technique that can non-invasively alter brain excitability in a frequency-specific  
108 manner by delivering weak alternating currents to the scalp (Kanai *et al.*, 2008;  
109 Kasten *et al.*, 2019; Krause *et al.*, 2019; Liu *et al.*, 2018; Voroslakos *et al.*, 2018). It is  
110 a wide-used tool for establishing a causal link between neural oscillations and  
111 cognition (Cabral-Calderin & Wilke, 2019; Johnson *et al.*, 2020), across a broad range  
112 of frequencies and tasks (Antal *et al.*, 2008; Helfrich *et al.*, 2014b; Kar & Krekelberg,  
113 2014; Pogosyan *et al.*, 2009; Reinhart & Nguyen, 2019; Y. Zhang *et al.*, 2019).  
114 However, tACS has not been applied to modulate VPL yet.

115 To this end, we stimulated human subjects' visual cortex by using tACS at a  
116 given frequency (10 Hz, 20 Hz, or 40 Hz) while they were practicing an orientation  
117 discrimination task subserved by early visual cortex (Bang *et al.*, 2018; Jia *et al.*,  
118 2020). We hypothesized that if neural oscillations of a given frequency band play an  
119 important role in the orientation discrimination learning, then applying tACS at that  
120 frequency band to the visual cortex will modulate the learning process and  
121 performance improvement.

## 122 **Materials and Methods**

### 123 *Subjects.*

124 A total of 87 healthy subjects (58 females,  $22.03 \pm 3.96$  years) participated in  
125 the present study. Subjects were assigned to one of five groups (Table 1): Group 1  
126 received occipital tACS at 10 Hz (the 10 Hz occipital stimulation group), Group 2  
127 received occipital tACS at 20 Hz (the 20 Hz occipital stimulation group), Group 3  
128 received occipital tACS at 40 Hz (the 40 Hz occipital stimulation group), Group 4  
129 received bilateral sensorimotor tACS at 10 Hz (the 10 Hz sensorimotor stimulation  
130 group), and Group 5 received occipital sham stimulation (the sham occipital  
131 stimulation group). The group sizes were determined by a power analysis ( $\alpha = 0.05$ ,  
132 two-tailed, power = 80%) based on our pilot study. A screening questionnaire was  
133 administered before starting the study for each subject. Subjects were included if they  
134 met the following criteria: 1) were right-handed; 2) were aged between 18–40 years; 3)  
135 had normal or corrected-to-normal vision. Subjects were excluded if they met the  
136 following criteria: 1) had a history of neural surgery or epileptic seizures, any  
137 psychiatric or neurological disorders; 2) had sleep disorders or a total sleep time less  
138 than eight hours per night over the last two weeks; 3) were during the menstrual cycle  
139 or pregnancy (Fertonani *et al.*, 2011; He *et al.*, 2019). The present study was approved  
140 by the Ethics Committee of School of Psychological and Cognitive Sciences, Peking  
141 University. Written consent was obtained from each subject prior to the beginning of  
142 this study.

### 143 *Apparatus and Stimulation protocol.*

144 Visual stimuli were generated and controlled using MATLAB (version 7.0) and  
145 Psychtoolbox-3 extensions (Brainard, 1997; Pelli, 1997) and were presented on a  
146 19-inch Sony Trinitron color monitor (spatial resolution =  $1600 \times 1200$  pixels, frame

147 rate = 85 Hz) with a grey background (mean luminance = 47.59 cd/m<sup>2</sup>). The  
148 experiments were run in a dimly lit room. The monitor was the only source of light in  
149 the room. A chin-and-head rest was used to stabilize the head at a viewing distance of  
150 65 cm. Subject's eye movements were monitored by an Eyelink 1000 plus  
151 eye-tracking system (SR Research Ltd., Ontario, Canada) throughout the whole  
152 experiment.

153 Electrical stimulation was delivered using the DC-STIMULATOR MC  
154 (neuroConn GmbH, Ilmenau, Germany) through a pair of rubber electrodes of 5×5  
155 cm<sup>2</sup>. The electrodes inserted in two soaked sponges (0.9% saline solution) were  
156 attached to the subjects' scalp using elastic bandages. A sinusoidal current with a  
157 peak-to-peak intensity of 1.5 mA was administered while subjects performed the  
158 training task. Both the DC offset and the phase difference between the two stimulation  
159 electrodes were set at zero. The impedance was constantly lower than 8 KΩ during  
160 all stimulation sessions.

#### 161 *Visual stimulus and task.*

162 Oriented Gabor patches (diameter = 1.25°; spatial frequency = 3.0 cycle/°;  
163 Michelson contrast = 0.5; standard deviation of Gaussian envelope = 0.42°; random  
164 spatial phase) were located 5° from fixation in the lower left quadrant of the visual  
165 field. Gabor patches were spatially masked by noise using a pixel replacement method  
166 at a given signal-to-noise (S/N) ratio (Shibata *et al.*, 2017). In our study, the S/N ratio  
167 was 75%, which meant that 25% of the pixels in the Gabor patch were replaced with  
168 random noise. In each trial, a small fixation point was displayed for 500 ms firstly,  
169 and then two Gabor patches with orientations of 26° and 26° +  $\theta$  were presented  
170 successively for 100 ms each and were separated by a 500 ms blank interval (Figure  
171 1(A)). These two Gabor patches were presented in random order. Subjects were



172 instructed to make a two-alternative forced-choice (2AFC) judgment of the  
173 orientation of the second Gabor patch relative to the first one (clockwise or  
174 counter-clockwise) by pressing a key. The  $\theta$  varied trial by trial and was adaptively  
175 controlled by a QUEST staircase to estimate subjects' discrimination threshold at 75%  
176 correct (Watson & Pelli, 1983). Subjects were asked to have a rest with their eyes  
177 closed after each staircase. Feedback was not provided in all test and training  
178 sessions.

179 *Design.*

180 A single-blind, sham-controlled, between-subject design was adopted to explore  
181 the role of tACS in modulating the orientation discrimination learning. Subjects  
182 underwent five daily training sessions of the orientation discrimination task, which  
183 was preceded by a pre-training test (Pre) and was followed by two post-training tests .  
184 One of the post-training tests was completed immediately after training, i.e., Post1,  
185 and the other one (Post2) was conducted at least two months after Post1 (Figure 1(B)).  
186 Each participant completed six QUEST staircases of 50 trials at Pre, Post1, and Post2,  
187 and nine QUEST staircases during each training session.

188 First, to investigate which stimulation frequency is able to modulate the  
189 orientation discrimination learning, we recruited three groups of subjects to take part  
190 in this study, i.e., the 10 Hz, 20 Hz, and 40 Hz occipital stimulation groups. The  
191 choice of stimulation frequency of tACS was based on the controversy of underlying  
192 neural oscillatory mechanisms of VPL (Bays *et al.*, 2015; Gruber *et al.*, 2002;  
193 Hamame *et al.*, 2011) and the study that found visual plasticity could be induced by  
194 20 Hz tACS (Kanai *et al.*, 2010). Also, 10 Hz, 20 Hz, and 40 Hz are representative  
195 frequencies of alpha band (8-12 Hz), beta band (13-30 Hz), and gamma band (above  
196 30 Hz) (Helfrich *et al.*, 2014a; Kanai *et al.*, 2010; Nakazono *et al.*, 2020; Struber *et al.*,

197 2014; Wach *et al.*, 2013; Zaehle *et al.*, 2010). Two electrodes were placed over  
198 subjects' visual cortex and the vertex (i.e., O2 and Cz in the international 10-20 EEG  
199 system), respectively (de Graaf *et al.*, 2020; Fertonani *et al.*, 2011; Hubel & Wiesel,  
200 1968; Jehee *et al.*, 2012; Jia *et al.*, 2020) (Figure 1(C)). The stimulated hemisphere  
201 was contralateral to the visual field where the Gabor patches were presented. Subjects  
202 received electrical stimulation at a given frequency for about 27 minutes with a  
203 ramp-up of 30 s during each training session.

204 Second, we asked whether the observed modulatory effects by the 10 Hz tACS  
205 (see Results) were due to potential indirect effects, such as placebo effect. To this end,  
206 a fourth group of subjects were recruited to participate in our study, i.e., the sham  
207 occipital stimulation group. The electrical stimulation parameters were the same as  
208 those in the 10 Hz occipital stimulation group, except that subjects in the sham  
209 occipital stimulation group received the 10 Hz tACS for 15 seconds with a ramp  
210 up/down of 30 s at the beginning of each training session.

211 Finally, to exam whether the 10 Hz tACS modulated the orientation  
212 discrimination learning in a stimulation location-specific manner, a fifth group of  
213 subjects were recruited, i.e., the 10 Hz sensorimotor stimulation group. The  
214 stimulation setting was similar to that in the 10 Hz occipital stimulation group, except  
215 that two electrodes were positioned over the bilateral sensorimotor cortical regions  
216 (Cappelletti *et al.*, 2013; Cappelletti *et al.*, 2015), i.e., C1 and C2.

### 217 *Statistical analysis methods*

218 For each test or training session, the estimated threshold was defined as the  
219 geometric mean of thresholds from all QUEST staircases. Percent improvement,  
220 which describes changes in performance after training, was calculated as  $(pre-training$   
221  $threshold - post-training threshold)/pre-training threshold \times 100\%$ . To illustrate

222 the threshold dynamics during the training course, a power function was used to fit  
223 the learning curves of orientation discrimination across all test and training sessions  
224 (Jeter *et al.*, 2009; P. Zhang *et al.*, 2018):

$$225 \quad \quad \quad Th(t) = \lambda \times (t)^{-\rho} + \alpha$$

226 Where  $Th$  is the predicted orientation discrimination threshold,  $t$  is the number of  
227 training sessions,  $\lambda$  is the initial threshold,  $\rho$  is the learning rate, and  $\alpha$  denotes the  
228 minimum threshold achieved after training. A nonlinear least-square method,  
229 implemented in MATLAB (MathWorks, Natick, MA), was used to minimize the sum  
230 of squared differences between model predictions and observed values.

231 Orientation discrimination thresholds were analyzed using a mixed-design  
232 analysis of variance (ANOVA) with a between-subjects factor *Group* (occipital 10 Hz,  
233 20 Hz, 40 Hz, sham, and sensorimotor 10 Hz) and a within-subjects factor *Test* (Pre,  
234 Post1 and Post2). Learning rates and percent improvements were analyzed using  
235 ANOVA with a between-subjects factor of *Group*. For multiple comparisons,  
236 Benjamini-Hochberg method (BH) was used to control false discovery rate  
237 (FDR)(Benjamini & Hochberg, 1995; Benjamini & Yekutieli, 2001). For ANOVAs,  
238  $\eta_p^2$  was computed as a measure of effect size. For t-tests, Cohen's  $d$  was computed as  
239 a measure of effect size. Statistical analyses were conducted using R (R Core Team,  
240 2020).

## 241 **Results**

### 242 **Occipital tACS modulated orientation discrimination learning in a** 243 **frequency-specific manner**

244 First, subjects stimulated by occipital tACS at 10 Hz, 20 Hz, and 40 Hz started  
245 with comparable performance at Pre ( $F(2, 49) = 0.33, p = 0.72, \eta_p^2 = 0.01$ ). As

246 shown in Figure 2 (A), subjects' orientation discrimination thresholds declined with  
247 training for all the training groups. For each subject, the orientation discrimination  
248 thresholds across all test and training sessions were fitted with a power function. A  
249 one-way ANOVA with *Group* (10 Hz, 20 Hz, and 40 Hz) as a between-subjects factor  
250 revealed that there were significant group differences in learning rate, i.e., the  
251 estimated  $\rho$ -value of the power function ( $F(2, 49) = 7.38, p = 0.002, \eta_p^2 = 0.23$ ).

252 *Post-hoc* analysis showed that the learning rate of the 10 Hz occipital stimulation  
253 group was significantly greater than those of the other two groups (10 Hz vs. 20 Hz:  
254  $t(32) = 3.37, p_{\text{adj}} = 0.004$ , Cohen's  $d = 0.98$ ; 10 Hz vs. 40 Hz:  $t(33) = 3.30, p_{\text{adj}} = 0.004$ ,  
255 Cohen's  $d = 1.09$ ), and there was no significant difference in learning rate between the  
256 20 Hz occipital stimulation and 40 Hz occipital stimulation groups ( $t(33) = -0.124$ ,  
257  $p_{\text{adj}} = 0.90$ ) (Figure 2(B)). These results demonstrated that, relative to beta and gamma  
258 frequencies, tACS at alpha frequency accelerated the learning process.

259 Then subjects' orientation discrimination thresholds were submitted to a  
260 mixed-design ANOVA with *Test* (Pre and Post1) as a within-subjects factor and *Group*  
261 (10 Hz, 20Hz, and 40 Hz) as a between-subjects factor to examine differences in  
262 performance. We found a significant main effect of *Test* ( $F(1, 49) = 83.48, p = 3.69 \times$   
263  $10^{-12}, \eta_p^2 = 0.63$ ), and a significant interaction between *Test* and *Group* ( $F(2, 49) =$   
264  $5.32, p = 0.008, \eta_p^2 = 0.18$ ), but no significant main effect of *Group* ( $F(2, 49) = 0.46$ ,  
265  $p = 0.63, \eta_p^2 = 0.02$ ). Further analyses showed that the thresholds at Post1 were  
266 lower than that those at Pre for all groups (all  $t_s < -3.78$ , all  $p_{\text{adj}}s < 0.002$ , and all  
267 Cohen's  $d_s > 0.92$ , by paired *t*-test), demonstrating significant learning effects  
268 occurred in an unsupervised manner here because no feedback was provided during  
269 learning (Loewenstein *et al.*, 2021; Tsodyks & Gilbert, 2004; Weiss *et al.*, 1993). At  
270 Post1, the threshold in the 10 Hz occipital stimulation group was significantly lower

271 than those in the 20 Hz occipital stimulation group ( $t(32) = -2.58, p_{\text{adj}} = 0.039$ ,  
272 Cohen's  $d = 0.87$ ) and the 40 Hz occipital stimulation group ( $t(33) = -2.57, p_{\text{adj}} =$   
273  $0.039$ , Cohen's  $d = 1.13$ ). The threshold difference between the 20 Hz and 40 Hz  
274 occipital stimulation groups was not significant ( $t(33) = 0.05, p = 0.96$ ) (Figure 2  
275 (C)).

276 The above results suggested that there was greater performance improvement in  
277 the 10 Hz occipital stimulation group. To confirm this, we performed a one-way  
278 ANOVA on percent improvement. The statistical results showed that the differences  
279 in percent improvement among the three stimulation groups were significant ( $F(2,$   
280  $49) = 5.82, p = 0.005, \eta_p^2 = 0.19$ ). *Post-hoc* analysis revealed that the percent  
281 improvement in the 10 Hz occipital stimulation group was higher than those in the 20  
282 Hz occipital stimulation group ( $t(32) = 2.96, p_{\text{adj}} = 0.014$ , Cohen's  $d = 1.00$ ) and the  
283 40 Hz occipital stimulation group ( $t(33) = 2.97, p_{\text{adj}} = 0.014$ , Cohen's  $d = 1.13$ ), and  
284 the difference between the 20 Hz and the 40 Hz occipital stimulation groups was not  
285 significant ( $t(33) = 0.03, p = 0.98$ ) (Figure 2 (D)). These results demonstrated that,  
286 relative to beta and gamma frequencies, tACS at alpha frequency enabled subjects to  
287 acquire a greater improvement in the learning task.

288 To examine whether the observed modulatory effects from the 10 Hz tACS were  
289 due to possible indirect effects (e.g., placebo effect), one more group of subjects  
290 received the sham occipital stimulation. Note that the learning effect in the sham  
291 occipital stimulation group is presumably equivalent to the learning effect without  
292 electrical stimulation. Compared with the sham occipital stimulation group, only the  
293 10 Hz occipital stimulation group showed a faster learning rate ( $t(32) = 3.79, p_{\text{adj}} =$   
294  $0.002$ , Cohen's  $d = 1.13$ ), a lower threshold at Post1 ( $t(32) = -2.58, p_{\text{adj}} = 0.02$ ,  
295 Cohen's  $d = 1.06$ ), and a greater improvement ( $t(32) = 3.48, p_{\text{adj}} = 0.005$ , Cohen's  $d =$

296 1.24), and these beneficial effects were absent in the 20 Hz and 40 Hz occipital  
297 stimulation groups (all  $ps > 0.90$ ).

298 Previous studies have shown that the after-effects of tACS on behavioral  
299 performance and neural activity are temporally short (Clancy *et al.*, 2018; Kasten *et*  
300 *al.*, 2016; Neuling *et al.*, 2013; Struber *et al.*, 2015), while one remarkable  
301 characteristics of VPL is the long-term persistence of learning effects after the  
302 termination of training (Bi *et al.*, 2014; Frank *et al.*, 2020; P. Zhang *et al.*, 2018). To  
303 examine whether the facilitatory effects on the orientation discrimination learning by  
304 the 10 Hz tACS is long-lasting, subjects in the 10 Hz occipital stimulation group and  
305 the sham occipital stimulation group were retested at least two months after Post1 (i.e.,  
306 Post2). For subjects in the 10 Hz occipital stimulation group, their thresholds at Post2  
307 were not significantly different from those at Post1 ( $t(16) = -0.37, p = 0.72$ ). Similarly,  
308 there was no significant difference in threshold between Post1 and Post2 in the sham  
309 occipital stimulation group ( $t(16) = -5.2 \times 10^{-3}, p = 0.99$ ) (Figure 3 (A)). Notably,  
310 some subjects (N = 9 and N = 12 in the 10 Hz occipital stimulation group and the  
311 sham occipital stimulation group, respectively) were retested at least 14 months after  
312 training, i.e., Post3. There was no significant difference in threshold between Post1  
313 and Post3 (10 Hz:  $t(8) = 1.51, p = 0.17$ ; sham:  $t(11) = 0.76, p = 0.47$ ) (Figure 3 (B)).  
314 Therefore, the modulatory effect of 10 Hz tACS on the orientation discrimination  
315 learning was remarkably long-lasting.

### 316 **10 Hz tACS modulated orientation discrimination learning in a location-specific** 317 **manner**

318 To explore whether the 10 Hz tACS modulated the orientation discrimination  
319 learning in a location-specific manner, one more group of subjects (i.e., the 10 Hz  
320 sensorimotor stimulation group) were trained on the orientation discrimination task

321 while their bilateral sensorimotor regions were stimulated by the 10 Hz tACS. For the  
322 three groups of subjects (the 10 Hz occipital stimulation group, the 10 Hz  
323 sensorimotor stimulation group, and the sham occipital stimulation group), they had  
324 about equal thresholds at Pre ( $F(2, 49) = 0.12, p = 0.88, \eta_p^2 = 0.005$ ). Extensive  
325 training reduced subjects' orientation discrimination thresholds gradually for all  
326 groups (Figure 4(A)). Again, there were significant differences in learning rate among  
327 the three groups ( $F(2, 49) = 10.60, p = 1.49 \times 10^{-4}, \eta_p^2 = 0.30$ ). The learning rate of  
328 the 10 Hz occipital stimulation group was greater than that of the 10 Hz sensorimotor  
329 stimulation group ( $t(32) = 4.21, p_{\text{adj}} = 3.26 \times 10^{-4}$ , Cohen's  $d = 1.27$ ), but the  
330 difference in learning rate between the 10 Hz sensorimotor stimulation group and the  
331 sham occipital stimulation group was not significant ( $t(33) = -0.41, p = 0.68$ ) (Figure  
332 4(B)). These results on learning rate demonstrated that the orientation discrimination  
333 learning efficiency was not modulated by the 10 Hz tACS applied at sensorimotor  
334 areas.

335       Regarding orientation discrimination thresholds, a  $2 \times 3$  mixed-design ANOVA  
336 with a within-subjects factor of *Test* (Pre and Post1) and a between-subjects factor of  
337 *Group* (occipital, sensorimotor, and sham) showed that the main effect of *Test* ( $F(1,$   
338  $49) = 63.04, p = 2.36 \times 10^{-10}, \eta_p^2 = 0.56$ ) and the interaction between *Test* and  
339 *Group* ( $F(2, 49) = 4.33, p = 0.019, \eta_p^2 = 0.15$ ) were significant, but the main effect of  
340 *Group* ( $F(2, 48) = 1.77, p = 0.18$ ) was not. Paired *t*-test showed that the thresholds at  
341 Post1 were lower than those at Pre for all the three groups (all  $t_s \leq -3.44$ , all  $p_{\text{adj}}s \leq$   
342  $0.003$ , and all Cohen's  $d_s \geq 0.83$ ). A simple main effect analysis revealed that, at  
343 Post1, the threshold in the 10 Hz occipital stimulation group was lower than that in  
344 the 10 Hz sensorimotor stimulation group ( $t(33) = -4.94, p_{\text{adj}} = 1.50 \times 10^{-4}$ , Cohen's

345  $d = 1.64$ ), but the threshold difference between the 10 Hz sensorimotor stimulation  
346 group and the sham occipital stimulation group was not significant ( $t(33) = 1.43, p =$   
347  $0.16$ ) (Figure 4 (C)). Accordingly, there were significant differences in percent  
348 improvement between the three groups ( $F(2, 49) = 8.69, p = 5.88 \times 10^{-4}, \eta_p^2 = 0.15$ ).  
349 *Post-hoc* analysis showed that the percent improvement in the 10 Hz occipital  
350 stimulation group was higher than that in the 10 Hz sensorimotor stimulation group  
351 ( $t(33) = 4.13, p_{\text{adj}} = 0.0013$ , Cohen's  $d = 1.38$ ), while there was no significant  
352 difference between the 10 Hz sensorimotor stimulation group and the sham occipital  
353 stimulation group ( $t(33) = -0.25, p = 0.81$ ) (Figure 4(D)). These results demonstrated  
354 that the 10 Hz tACS delivered over sensorimotor areas did not result in more  
355 performance improvements in the orientation discrimination learning.  
356



## 357 **Discussion**

358       To better understand the neural oscillatory mechanisms underlying VPL, tACS  
359 was administered while subjects were undertaking an orientation discrimination  
360 learning task. Our study showed that, relative to sham stimulation, 10 Hz tACS  
361 applied to visual cortex accelerated learning and led to greater improvement in task  
362 performance. The facilitatory effects were absent when visual cortex was stimulated  
363 by tACS at other frequencies (20 Hz and 40 Hz) or when other cortical areas  
364 (sensorimotor cortical areas) were stimulated by 10 Hz tACS, indicating that tACS  
365 modulated VPL in a frequency- and location-specific manner. To the best of our  
366 knowledge, this is the first study demonstrating the effects of tACS on VPL. Our  
367 results provide strong evidence of the causal role of occipital alpha band oscillations  
368 in VPL, updating our knowledge on the role of alpha oscillations in neural plasticity.  
369 Moreover, it is also the first study showing that the enhanced performance by  
370 combining perceptual training and non-invasive brain stimulation could last at least  
371 one year after training, which provides a promising and feasible way for clinical  
372 applications.

373       Our finding of the causal role of occipital alpha oscillations in VPL is consistent  
374 with previous human EEG studies across different visual learning tasks (Bays *et al.*,  
375 2015; Muller-Gass *et al.*, 2017; Nikolaev *et al.*, 2016; Toosi *et al.*, 2017), and is also  
376 consistent with tactile perceptual learning studies (Brickwedde *et al.*, 2019; Freyer *et*  
377 *al.*, 2013; Freyer *et al.*, 2012). These EEG learning studies suggested that the alpha  
378 power enhancement in parietal-occipital regions is a manifestation of the neural  
379 mechanisms of perceptual learning. Furthermore, both the resting-state alpha power  
380 before learning (Freyer *et al.*, 2013; Muller-Gass *et al.*, 2017) and the  
381 learning-induced alpha power changes during task execution (Brickwedde *et al.*, 2019;

382 Freyer *et al.*, 2013) correlated with individual's learning outcomes, demonstrating a  
383 close association between alpha oscillations and perceptual learning. Taken together,  
384 all these studies point to a pivotal role of alpha oscillations in perceptual learning.

385 We note that our study is different from some previous studies in scientific  
386 finding and method. First, several human EEG studies found that training induced  
387 increases in gamma or beta band oscillations (Gruber *et al.*, 2001; Gruber *et al.*, 2002;  
388 Hamame *et al.*, 2011; La Rocca *et al.*, 2020; Theves *et al.*, 2020). Several factors  
389 could explain this discrepancy. For instance, different stimuli and tasks, which  
390 engaged distinctive processing mechanisms, were used in these learning studies  
391 (Brunet & Fries, 2019; Gruber *et al.*, 2002). Also, in these studies, EEG was recorded  
392 before and after training, while tACS was administrated during training in our study.  
393 Second, previous studies found that transcranial direct current stimulation (tDCS) and  
394 transcranial random noise stimulation (tRNS) were able to modulate VPL (Cappelletti  
395 *et al.*, 2013; Contemori *et al.*, 2019; Fertoni *et al.*, 2011; Frangou *et al.*, 2018;  
396 Herpich *et al.*, 2019; Van Meel *et al.*, 2016). However, both tDCS and tRNS, with less  
397 understood working mechanisms, cannot alter brain oscillations in a  
398 frequency-specific manner, which limits our understanding of the neural oscillatory  
399 mechanisms of VPL.

400 Previous studies on the biophysical mechanisms of tACS have already provided  
401 strong support for the efficacy of tACS on altering neural oscillations. TACS applied  
402 over the scalp can generate changes in intracerebral electric fields in non-human  
403 primates (Johnson *et al.*, 2020; Kar *et al.*, 2017; Krause *et al.*, 2019; Vieira *et al.*,  
404 2020) and humans (Opitz *et al.*, 2016; Voroslakos *et al.*, 2018), thereby modifying  
405 ongoing neural oscillations in the targeted brain region (Helfrich *et al.*, 2014b; Kar *et*  
406 *al.*, 2017; Kasten *et al.*, 2018; Vossen *et al.*, 2015; Zaehle *et al.*, 2010). The tACS

407 effects are usually manifested as increased neural spectral power and/or phase  
408 synchronization (Helfrich *et al.*, 2014b; Huang *et al.*, 2021), which is confirmed by  
409 our EEG experiment. In this experiment, we recorded subjects' resting-state EEG  
410 signals for 10 minutes both before and after 25-min 10Hz tACS over O2, which is  
411 roughly equivalent to the stimulation time in the main experiment. We analyzed 1-min  
412 EEG signals before and after the stimulation from Oz, O2, POz, and PO4 (Kasten *et*  
413 *al.*, 2016). We found that subjects' resting-state alpha power after the tACS  
414 stimulation was significantly higher than that before the stimulation. It is noteworthy  
415 that, in our study, tACS at alpha frequency modulated VPL in a location-specific  
416 manner. This ruled out possibly indirect effects, such as retinal stimulation,  
417 transcutaneous stimulation of peripheral nerves, and placebo effects (Asamoah *et al.*,  
418 2019; Liu *et al.*, 2018; Turi *et al.*, 2013). Taken together, these results suggest that  
419 occipital tACS at 10 Hz entrained endogenous alpha oscillations in visual cortex and  
420 thereby facilitated VPL causally.

421       The functional role of alpha band neural oscillations in visual perception,  
422 attention, and other cognitive functions has been recognized for a long time. Rather  
423 than only reflecting an idling state of the brain (Clayton *et al.*, 2018; Sigala *et al.*,  
424 2014), it functions to gate ongoing sensory information processing (Jensen &  
425 Mazaheri, 2010; VanRullen, 2016). According to a dominant view about the function  
426 of alpha oscillations - the inhibition hypothesis, alpha oscillations are assumed to  
427 actively suppress processing of irrelevant sensory information and therefore direct  
428 computational neural resources to task-relevant events of higher priority (Klimesch *et*  
429 *al.*, 2007). Specifically, alpha power is correlated with neural excitability negatively  
430 (Lange *et al.*, 2013; Romei *et al.*, 2008), and higher alpha power is predictive of  
431 decreased visual detection and discrimination performance (Ergenoglu *et al.*, 2004;

432 Mathewson *et al.*, 2014; Roberts *et al.*, 2014; van Dijk *et al.*, 2008; Zazio *et al.*, 2020).  
433 Since many studies have demonstrated that alpha tACS is able to increase ongoing  
434 alpha power (Clayton *et al.*, 2019; Helfrich *et al.*, 2014b; Kasten *et al.*, 2019;  
435 Nakazono *et al.*, 2020; Zaehle *et al.*, 2010; Y. Zhang *et al.*, 2019), the inhibition  
436 hypothesis cannot explain our finding here straightforwardly. Notably, it has been  
437 argued that alpha oscillations also reflect cortical feedback mechanisms in visual  
438 cortex (Keller *et al.*, 2020; Mejias *et al.*, 2016; Michalareas *et al.*, 2016; van  
439 Kerkoerle *et al.*, 2014). For example, using intracranial multi-array recording in  
440 monkeys, researchers found that neural activity in primary visual area V1 was driven  
441 by feedback signals in the alpha band from visual area V4 (Bastos *et al.*, 2015; van  
442 Kerkoerle *et al.*, 2014). This interregional feedback projections from V4 to V1 was  
443 also confirmed in human magnetoencephalography (MEG) study (Michalareas *et al.*,  
444 2016). Recently, studies from several research groups proposed that VPL could be  
445 implemented, at least partially, by cortical feedback connections that propagated  
446 neural signals from higher to lower areas (Crist *et al.*, 2001; Jia *et al.*, 2020;  
447 Moldakarimov *et al.*, 2014; Mukai *et al.*, 2007; Schafer *et al.*, 2007; Y. Yan *et al.*,  
448 2018). Under this framework, entrained alpha oscillations by 10 Hz tACS might boost  
449 VPL by strengthening cortico-cortical feedback connections, which can be  
450 investigated in the future

451 Our findings not only deepen our understanding of the neural mechanisms  
452 underlying VPL, but also offer a promising guide for future clinical intervention to  
453 impaired visual functions. In clinical practice, efficacy/effectiveness, efficiency, and  
454 persistence are three of the most remarkable factors that constrain the application of  
455 perceptual enhancement methods or techniques (Herpich *et al.*, 2019; Rodan *et al.*,  
456 2020). In our study, we found that applying tACS at 10 Hz over the visual cortex is

457 able to help observers obtain more benefits within a shorter time. What is more, the  
458 modulatory effect of occipital 10 Hz tACS on visual performance was able to last for  
459 a very long period. Therefore, our training and stimulation protocol can be used as a  
460 potential treatment to help rehabilitate impaired visual functions in clinical  
461 populations, such as, patients with neuro-ophthalmological disorders (Levi & Li,  
462 2009).

## 463 Reference

- 464 Antal, A., Boros, K., Poreisz, C., Chaieb, L., Terney, D., & Paulus, W. (2008). Comparatively weak  
465 after-effects of transcranial alternating current stimulation (tACS) on cortical excitability in  
466 humans. *Brain Stimul*, *1*(2), 97-105.
- 467 Asamoah, B., Khatoun, A., & Mc Laughlin, M. (2019). tACS motor system effects can be caused by  
468 transcutaneous stimulation of peripheral nerves. *Nat Commun*, *10*(1), 266.
- 469 Bang, J. W., Sasaki, Y., Watanabe, T., & Rahnev, D. (2018). Feature-Specific Awake Reactivation in  
470 Human V1 after Visual Training. *J Neurosci*, *38*(45), 9648-9657.
- 471 Bastos, A. M., Litvak, V., Moran, R., Bosman, C. A., Fries, P., & Friston, K. J. (2015). A DCM study of  
472 spectral asymmetries in feedforward and feedback connections between visual areas V1 and  
473 V4 in the monkey. *Neuroimage*, *108*, 460-475.
- 474 Bays, B. C., Visscher, K. M., Le Dantec, C. C., & Seitz, A. R. (2015). Alpha-band EEG activity in  
475 perceptual learning. *J Vis*, *15*(10), 1-12.
- 476 Benjamini, Y., & Hochberg, Y. (1995). Controlling the False Discovery Rate: A Practical and Powerful  
477 Approach to Multiple Testing. *J. R. Stat. Soc. B*, *57*(1), 289-300.
- 478 Benjamini, Y., & Yekutieli, D. (2001). The control of the false discovery rate in multiple testing  
479 under dependency. *Ann. Statist.*, *29*(4), 1165-1188.
- 480 Bi, T., Chen, J., Zhou, T., He, Y., & Fang, F. (2014). Function and structure of human left fusiform  
481 cortex are closely associated with perceptual learning of faces. *Curr Biol*, *24*(2), 222-227.
- 482 Brainard, D. H. (1997). The Psychophysics Toolbox. *Spat Vis*, *10*(4), 433-436.
- 483 Brickwedde, M., Kruger, M. C., & Dinse, H. R. (2019). Somatosensory alpha oscillations gate  
484 perceptual learning efficiency. *Nat Commun*, *10*(1), 263.
- 485 Brunet, N. M., & Fries, P. (2019). Human visual cortical gamma reflects natural image structure.  
486 *Neuroimage*, *200*, 635-643.
- 487 Buzsaki, G., & Draguhn, A. (2004). Neuronal oscillations in cortical networks. *Science*, *304*(5679),  
488 1926-1929.
- 489 Cabral-Calderin, Y., & Wilke, M. (2019). Probing the Link Between Perception and Oscillations:  
490 Lessons from Transcranial Alternating Current Stimulation. *Neuroscientist*, *26*(1), 57-73.
- 491 Cappelletti, M., Gessaroli, E., Hithersay, R., Mitolo, M., Didino, D., Kanai, R., . . . Walsh, V. (2013).  
492 Transfer of cognitive training across magnitude dimensions achieved with concurrent brain  
493 stimulation of the parietal lobe. *J Neurosci*, *33*(37), 14899-14907.
- 494 Cappelletti, M., Pikkat, H., Upstill, E., Speekenbrink, M., & Walsh, V. (2015). Learning to integrate  
495 versus inhibiting information is modulated by age. *J Neurosci*, *35*(5), 2213-2225.
- 496 Chen, N., Bi, T., Zhou, T., Li, S., Liu, Z., & Fang, F. (2015). Sharpened cortical tuning and enhanced  
497 cortico-cortical communication contribute to the long-term neural mechanisms of visual  
498 motion perceptual learning. *Neuroimage*, *115*, 17-29.
- 499 Chen, N., Cai, P., Zhou, T., Thompson, B., & Fang, F. (2016). Perceptual learning modifies the  
500 functional specializations of visual cortical areas. *Proc Natl Acad Sci U S A*, *113*(20),  
501 5724-5729.
- 502 Clancy, K. J., Baisley, S. K., Albizu, A., Kartvelishvili, N., Ding, M., & Li, W. (2018). Lasting  
503 connectivity increase and anxiety reduction via transcranial alternating current stimulation.  
504 *Soc Cogn Affect Neurosci*, *13*(12), 1305-1316.
- 505 Clayton, M. S., Yeung, N., & Cohen Kadosh, R. (2018). The many characters of visual alpha

- 506 oscillations. *Eur J Neurosci*, 48(7), 2498-2508.
- 507 Clayton, M. S., Yeung, N., & Cohen Kadosh, R. (2019). Electrical stimulation of alpha oscillations  
508 stabilizes performance on visual attention tasks. *J Exp Psychol Gen*, 148(2), 203-220.
- 509 Contemori, G., Trotter, Y., Cottureau, B. R., & Maniglia, M. (2019). tRNS boosts perceptual learning in  
510 peripheral vision. *Neuropsychologia*, 125, 129-136.
- 511 Crist, R. E., Li, W., & Gilbert, C. D. (2001). Learning to see: experience and attention in primary visual  
512 cortex. *Nat Neurosci*, 4(5), 519-525.
- 513 de Graaf, T. A., Thomson, A., Janssens, S. E. W., van Bree, S., Ten Oever, S., & Sack, A. T. (2020).  
514 Does alpha phase modulate visual target detection? Three experiments with tACS-phase-based  
515 stimulus presentation. *Eur J Neurosci*, 51(11), 2299-2313.
- 516 Doshier, B. A., & Lu, Z. L. (1998). Perceptual learning reflects external noise filtering and internal  
517 noise reduction through channel reweighting. *Proc Natl Acad Sci U S A*, 95(23), 13988-13993.
- 518 Ergenoglu, T., Demiralp, T., Bayraktaroglu, Z., Ergen, M., Beydagi, H., & Uresin, Y. (2004). Alpha  
519 rhythm of the EEG modulates visual detection performance in humans. *Brain Res Cogn Brain*  
520 *Res*, 20(3), 376-383.
- 521 Fertonani, A., Pirulli, C., & Miniussi, C. (2011). Random noise stimulation improves neuroplasticity in  
522 perceptual learning. *J Neurosci*, 31(43), 15416-15423.
- 523 Frangou, P., Correia, M., & Kourtzi, Z. (2018). GABA, not BOLD, reveals dissociable  
524 learning-dependent plasticity mechanisms in the human brain. *eLife*, 7, e35854.
- 525 Frank, S. M., Qi, A., Ravasio, D., Sasaki, Y., Rosen, E. L., & Watanabe, T. (2020). Supervised Learning  
526 Occurs in Visual Perceptual Learning of Complex Natural Images. *Curr Biol*, 30(15),  
527 2995-3000 e2993.
- 528 Freyer, F., Becker, R., Dinse, H. R., & Ritter, P. (2013). State-dependent perceptual learning. *J*  
529 *Neurosci*, 33(7), 2900-2907.
- 530 Freyer, F., Reinacher, M., Nolte, G., Dinse, H. R., & Ritter, P. (2012). Repetitive tactile stimulation  
531 changes resting-state functional connectivity-implications for treatment of sensorimotor  
532 decline. *Front Hum Neurosci*, 6, 144.
- 533 Furmanski, C. S., Schluppeck, D., & Engel, S. A. (2004). Learning strengthens the response of primary  
534 visual cortex to simple patterns. *Curr Biol*, 14(7), 573-578.
- 535 Gold, J. I., Law, C. T., Connolly, P., & Bennur, S. (2008). The relative influences of priors and sensory  
536 evidence on an oculomotor decision variable during perceptual learning. *J Neurophysiol*,  
537 100(5), 2653-2668.
- 538 Gruber, T., Keil, A., & Muller, M. M. (2001). Modulation of induced gamma band responses and phase  
539 synchrony in a paired associate learning task in the human EEG. *Neurosci Lett*, 316(1), 29-32.
- 540 Gruber, T., Muller, M. M., & Keil, A. (2002). Modulation of induced gamma band responses in a  
541 perceptual learning task in the human EEG. *J Cogn Neurosci*, 14(5), 732-744.
- 542 Hamame, C. M., Cosmelli, D., Henriquez, R., & Aboitiz, F. (2011). Neural mechanisms of human  
543 perceptual learning: electrophysiological evidence for a two-stage process. *PLoS One*, 6(4),  
544 e19221.
- 545 He, Q., Lin, B. R., Zhao, J., Shi, Y. Z., Yan, F. F., & Huang, C. B. (2019). No effects of anodal  
546 transcranial direct current stimulation on contrast sensitivity function. *Restor Neurol Neurosci*,  
547 37(2), 109-118.
- 548 Helfrich, R. F., Knepper, H., Nolte, G., Struber, D., Rach, S., Herrmann, C. S., . . . Engel, A. K. (2014a).  
549 Selective modulation of interhemispheric functional connectivity by HD-tACS shapes

- 550 perception. *PLoS Biol*, 12(12), e1002031.
- 551 Helfrich, R. F., Schneider, T. R., Rach, S., Trautmann-Lengsfeld, S. A., Engel, A. K., & Herrmann, C. S.  
552 (2014b). Entrainment of brain oscillations by transcranial alternating current stimulation. *Curr*  
553 *Biol*, 24(3), 333-339.
- 554 Herpich, F., Melnick, M. D., Agosta, S., Huxlin, K. R., Tadin, D., & Battelli, L. (2019). Boosting  
555 Learning Efficacy with Noninvasive Brain Stimulation in Intact and Brain-Damaged Humans.  
556 *J Neurosci*, 39(28), 5551-5561.
- 557 Hua, T., Bao, P., Huang, C. B., Wang, Z., Xu, J., Zhou, Y., & Lu, Z. L. (2010). Perceptual learning  
558 improves contrast sensitivity of V1 neurons in cats. *Curr Biol*, 20(10), 887-894.
- 559 Huang, W. A., Stitt, I. M., Negahbani, E., Passey, D. J., Ahn, S., Davey, M., . . . Frohlich, F. (2021).  
560 Transcranial alternating current stimulation entrains alpha oscillations by preferential phase  
561 synchronization of fast-spiking cortical neurons to stimulation waveform. *Nat Commun*, 12(1),  
562 3151.
- 563 Hubel, D. H., & Wiesel, T. N. (1968). Receptive fields and functional architecture of monkey striate  
564 cortex. *J Physiol*, 195(1), 215-243.
- 565 Jehee, J. F., Ling, S., Swisher, J. D., van Bergen, R. S., & Tong, F. (2012). Perceptual learning  
566 selectively refines orientation representations in early visual cortex. *J Neurosci*, 32(47),  
567 16747-16753a.
- 568 Jensen, O., & Mazaheri, A. (2010). Shaping functional architecture by oscillatory alpha activity: gating  
569 by inhibition. *Front Hum Neurosci*, 4(186), 186.
- 570 Jeter, P. E., Doshier, B. A., Petrov, A., & Lu, Z. L. (2009). Task precision at transfer determines  
571 specificity of perceptual learning. *J Vis*, 9(3), 11-13.
- 572 Jia, K., Zamboni, E., Kemper, V., Rua, C., Goncalves, N. R., Ng, A. K. T., . . . Kourtzi, Z. (2020).  
573 Recurrent Processing Drives Perceptual Plasticity. *Curr Biol*, 4177 - 4187.
- 574 Johnson, L., Alekseichuk, I., Krieg, J., Doyle, A., Yu, Y., Vitek, J., . . . Opitz, A. (2020).  
575 Dose-dependent effects of transcranial alternating current stimulation on spike timing in  
576 awake nonhuman primates. *Sci Adv*, 6(36), eaaz2747.
- 577 Kanai, R., Chaieb, L., Antal, A., Walsh, V., & Paulus, W. (2008). Frequency-dependent electrical  
578 stimulation of the visual cortex. *Curr Biol*, 18(23), 1839-1843.
- 579 Kanai, R., Paulus, W., & Walsh, V. (2010). Transcranial alternating current stimulation (tACS)  
580 modulates cortical excitability as assessed by TMS-induced phosphene thresholds. *Clin*  
581 *Neurophysiol*, 121(9), 1551-1554.
- 582 Kar, K., Duijnhouwer, J., & Krekelberg, B. (2017). Transcranial Alternating Current Stimulation  
583 Attenuates Neuronal Adaptation. *J Neurosci*, 37(9), 2325-2335.
- 584 Kar, K., & Krekelberg, B. (2014). Transcranial alternating current stimulation attenuates visual motion  
585 adaptation. *J Neurosci*, 34(21), 7334-7340.
- 586 Kasten, F. H., Dowsett, J., & Herrmann, C. S. (2016). Sustained Aftereffect of alpha-tACS Lasts Up to  
587 70 min after Stimulation. *Front Hum Neurosci*, 10, 245.
- 588 Kasten, F. H., Duecker, K., Maack, M. C., Meiser, A., & Herrmann, C. S. (2019). Integrating electric  
589 field modeling and neuroimaging to explain inter-individual variability of tACS effects. *Nat*  
590 *Commun*, 10(1), 5427.
- 591 Kasten, F. H., Maess, B., & Herrmann, C. S. (2018). Facilitated Event-Related Power Modulations  
592 during Transcranial Alternating Current Stimulation (tACS) Revealed by Concurrent  
593 tACS-MEG. *eNeuro*, 5(3).



- 594 Keller, A. J., Roth, M. M., & Scanziani, M. (2020). Feedback generates a second receptive field in  
595 neurons of the visual cortex. *Nature*, 582(7813), 545-549.
- 596 Klimesch, W., Sauseng, P., & Hanslmayr, S. (2007). EEG alpha oscillations: the inhibition-timing  
597 hypothesis. *Brain Res Rev*, 53(1), 63-88.
- 598 Krause, M. R., Vieira, P. G., Csorba, B. A., Pilly, P. K., & Pack, C. C. (2019). Transcranial alternating  
599 current stimulation entrains single-neuron activity in the primate brain. *Proc Natl Acad Sci U*  
600 *SA*, 116(12), 5747-5755.
- 601 La Rocca, D., Ciuciu, P., Engemann, D. A., & van Wassenhove, V. (2020). Emergence of beta and  
602 gamma networks following multisensory training. *Neuroimage*, 206, 116313.
- 603 Lange, J., Oostenveld, R., & Fries, P. (2013). Reduced occipital alpha power indexes enhanced  
604 excitability rather than improved visual perception. *J Neurosci*, 33(7), 3212-3220.
- 605 Law, C.-T., & Gold, J. I. (2008). Neural correlates of perceptual learning in a sensory-motor, but not a  
606 sensory, cortical area. *Nat Neurosci*, 11(4), 505-513.
- 607 Levi, D. M., & Li, R. W. (2009). Improving the performance of the amblyopic visual system. *Philos*  
608 *Trans R Soc Lond B Biol Sci*, 364(1515), 399-407.
- 609 Liu, A., Voroslakos, M., Kronberg, G., Henin, S., Krause, M. R., Huang, Y., . . . Buzsaki, G. (2018).  
610 Immediate neurophysiological effects of transcranial electrical stimulation. *Nat Commun*, 9(1),  
611 5092.
- 612 Loewenstein, Y., Raviv, O., & Ahissar, M. (2021). Dissecting the Roles of Supervised and  
613 Unsupervised Learning in Perceptual Discrimination Judgments. *J Neurosci*, 41(4), 757-765.
- 614 Lu, J., Luo, L., Wang, Q., Fang, F., & Chen, N. (2021). Cue-triggered activity replay in human early  
615 visual cortex. *Sci China Life Sci*, 64(1), 144-151.
- 616 Maniglia, M., & Seitz, A. R. (2018). Towards a whole brain model of Perceptual Learning. *Curr Opin*  
617 *Behav Sci*, 20, 47-55.
- 618 Mathewson, K. E., Beck, D. M., Ro, T., Maclin, E. L., Low, K. A., Fabiani, M., & Gratton, G. (2014).  
619 Dynamics of alpha control: preparatory suppression of posterior alpha oscillations by frontal  
620 modulators revealed with combined EEG and event-related optical signal. *J Cogn Neurosci*,  
621 26(10), 2400-2415.
- 622 Mayhew, S. D., Li, S., & Kourtzi, Z. (2012). Learning acts on distinct processes for visual form  
623 perception in the human brain. *J Neurosci*, 32(3), 775-786.
- 624 Mejias, J. F., Murray, J. D., Kennedy, H., & Wang, X. J. (2016). Feedforward and feedback  
625 frequency-dependent interactions in a large-scale laminar network of the primate cortex. *Sci*  
626 *Adv*, 2(11), e1601335.
- 627 Michalareas, G., Vezoli, J., van Pelt, S., Schoffelen, J. M., Kennedy, H., & Fries, P. (2016). Alpha-Beta  
628 and Gamma Rhythms Subserve Feedback and Feedforward Influences among Human Visual  
629 Cortical Areas. *Neuron*, 89(2), 384-397.
- 630 Moldakarimov, S., Bazhenov, M., & Sejnowski, T. J. (2014). Top-down inputs enhance orientation  
631 selectivity in neurons of the primary visual cortex during perceptual learning. *PLoS Comput*  
632 *Biol*, 10(8), e1003770.
- 633 Mukai, I., Kim, D., Fukunaga, M., Japee, S., Marrett, S., & Ungerleider, L. G. (2007). Activations in  
634 visual and attention-related areas predict and correlate with the degree of perceptual learning.  
635 *J Neurosci*, 27(42), 11401-11411.
- 636 Muller-Gass, A., Duncan, M., & Campbell, K. (2017). Brain states predict individual differences in  
637 perceptual learning. *Pers Individ Dif*, 118, 29-38.

- 638 Nakazono, H., Ogata, K., Takeda, A., Yamada, E., Kimura, T., & Tobimatsu, S. (2020). Transcranial  
639 alternating current stimulation of  $\alpha$  but not  $\beta$  frequency sharpens multiple visual functions.  
640 *Brain Stimul*, 13(2), 343-352.
- 641 Neuling, T., Rach, S., & Herrmann, C. S. (2013). Orchestrating neuronal networks: sustained  
642 after-effects of transcranial alternating current stimulation depend upon brain states. *Front*  
643 *Hum Neurosci*, 7, 161.
- 644 Nikolaev, A. R., Gepshtein, S., & van Leeuwen, C. (2016). Intermittent regime of brain activity at the  
645 early, bias-guided stage of perceptual learning. *J Vis*, 16(14).
- 646 Opitz, A., Falchier, A., Yan, C. G., Yeagle, E. M., Linn, G. S., Megevand, P., . . . Schroeder, C. E.  
647 (2016). Spatiotemporal structure of intracranial electric fields induced by transcranial electric  
648 stimulation in humans and nonhuman primates. *Sci Rep*, 6, 31236.
- 649 Pelli, D. G. (1997). The VideoToolbox software for visual psychophysics: Transforming numbers into  
650 movies. *Spat Vis*, 10(4), 437-442.
- 651 Pogosyan, A., Gaynor, L. D., Eusebio, A., & Brown, P. (2009). Boosting cortical activity at Beta-band  
652 frequencies slows movement in humans. *Curr Biol*, 19(19), 1637-1641.
- 653 R Core Team. (2020). R: A Language and Environment for Statistical Computing (Version 4.0.3).  
654 Vienna, Austria: R Foundation for Statistical Computing. Retrieved from  
655 <http://www.R-project.org/>
- 656 Reinhart, R. M. G., & Nguyen, J. A. (2019). Working memory revived in older adults by synchronizing  
657 rhythmic brain circuits. *Nat Neurosci*, 22(5), 820-827.
- 658 Roberts, D. M., Fedota, J. R., Buzzell, G. A., Parasuraman, R., & McDonald, C. G. (2014). Prestimulus  
659 oscillations in the alpha band of the EEG are modulated by the difficulty of feature  
660 discrimination and predict activation of a sensory discrimination process. *J Cogn Neurosci*,  
661 26(8), 1615-1628.
- 662 Rodan, A., Candela Marroquin, E., & Jara Garcia, L. C. (2020). An updated review about perceptual  
663 learning as a treatment for amblyopia. *J Optom*.
- 664 Romei, V., Brodbeck, V., Michel, C., Amedi, A., Pascual-Leone, A., & Thut, G. (2008). Spontaneous  
665 fluctuations in posterior alpha-band EEG activity reflect variability in excitability of human  
666 visual areas. *Cereb Cortex*, 18(9), 2010-2018.
- 667 Sanayei, M., Chen, X., Chicharro, D., Distler, C., Panzeri, S., & Thiele, A. (2018). Perceptual learning  
668 of fine contrast discrimination changes neuronal tuning and population coding in macaque V4.  
669 *Nat Commun*, 9(1), 4238.
- 670 Schafer, R., Vasilaki, E., & Senn, W. (2007). Perceptual learning via modification of cortical top-down  
671 signals. *PLoS Comput Biol*, 3(8), e165.
- 672 Schnitzler, A., & Gross, J. (2005). Normal and pathological oscillatory communication in the brain. *Nat*  
673 *Rev Neurosci*, 6(4), 285-296.
- 674 Schoups, A., Vogels, R., Qian, N., & Orban, G. (2001). Practising orientation identification improves  
675 orientation coding in V1 neurons. *Nature*, 412(6846), 549-553.
- 676 Shibata, K., Sasaki, Y., Bang, J. W., Walsh, E. G., Machizawa, M. G., Tamaki, M., . . . Watanabe, T.  
677 (2017). Overlearning hyperstabilizes a skill by rapidly making neurochemical processing  
678 inhibitory-dominant. *Nat Neurosci*, 20(3), 470-475.
- 679 Sigala, R., Haufe, S., Roy, D., Dinse, H. R., & Ritter, P. (2014). The role of alpha-rhythm states in  
680 perceptual learning: insights from experiments and computational models. *Front Comput*  
681 *Neurosci*, 8, 36.

- 682 Struber, D., Rach, S., Neuling, T., & Herrmann, C. S. (2015). On the possible role of stimulation  
683 duration for after-effects of transcranial alternating current stimulation. *Front Cell Neurosci*, 9,  
684 311.
- 685 Struber, D., Rach, S., Trautmann-Lengsfeld, S. A., Engel, A. K., & Herrmann, C. S. (2014). Antiphase  
686 40 Hz oscillatory current stimulation affects bistable motion perception. *Brain Topogr*, 27(1),  
687 158-171.
- 688 Theves, S., Chan, J. S., Naumer, M. J., & Kaiser, J. (2020). Improving audio-visual temporal  
689 perception through training enhances beta-band activity. *Neuroimage*, 206, 116312.
- 690 Thut, G., Miniussi, C., & Gross, J. (2012). The functional importance of rhythmic activity in the brain.  
691 *Curr Biol*, 22(16), R658-663.
- 692 Toosi, T., E, K. T., & Esteky, H. (2017). Learning temporal context shapes prestimulus alpha  
693 oscillations and improves visual discrimination performance. *J Neurophysiol*, 118(2),  
694 771-777.
- 695 Tsodyks, M., & Gilbert, C. (2004). Neural networks and perceptual learning. *Nature*, 431(7010),  
696 775-781.
- 697 Turi, Z., Ambrus, G. G., Janacsek, K., Emmert, K., Hahn, L., Paulus, W., & Antal, A. (2013). Both the  
698 cutaneous sensation and phosphene perception are modulated in a frequency-specific manner  
699 during transcranial alternating current stimulation. *Restor Neurol Neurosci*, 31(3), 275-285.
- 700 van Dijk, H., Schoffelen, J. M., Oostenveld, R., & Jensen, O. (2008). Prestimulus oscillatory activity in  
701 the alpha band predicts visual discrimination ability. *J Neurosci*, 28(8), 1816-1823.
- 702 van Kerkoerle, T., Self, M. W., Dagnino, B., Gariel-Mathis, M. A., Poort, J., van der Togt, C., &  
703 Roelfsema, P. R. (2014). Alpha and gamma oscillations characterize feedback and  
704 feedforward processing in monkey visual cortex. *Proc Natl Acad Sci U S A*, 111(40),  
705 14332-14341.
- 706 Van Meel, C., Daniels, N., de Beeck, H. O., & Baeck, A. (2016). Effect of tDCS on task relevant and  
707 irrelevant perceptual learning of complex objects. *J Vis*, 16(6), 1-15.
- 708 VanRullen, R. (2016). Perceptual Cycles. *Trends Cogn Sci*, 20(10), 723-735.
- 709 Vieira, P. G., Krause, M. R., & Pack, C. C. (2020). tACS entrains neural activity while somatosensory  
710 input is blocked. *PLoS Biol*, 18(10), e3000834.
- 711 Voroslakos, M., Takeuchi, Y., Brinyiczki, K., Zombori, T., Oliva, A., Fernandez-Ruiz, A., . . . Berenyi,  
712 A. (2018). Direct effects of transcranial electric stimulation on brain circuits in rats and  
713 humans. *Nat Commun*, 9(1), 483.
- 714 Vossen, A., Gross, J., & Thut, G. (2015). Alpha Power Increase After Transcranial Alternating Current  
715 Stimulation at Alpha Frequency ( $\alpha$ -tACS) Reflects Plastic Changes Rather Than Entrainment.  
716 *Brain Stimul*, 8(3), 499-508.
- 717 Wach, C., Krause, V., Moliadze, V., Paulus, W., Schnitzler, A., & Pollok, B. (2013). Effects of 10 Hz  
718 and 20 Hz transcranial alternating current stimulation (tACS) on motor functions and motor  
719 cortical excitability. *Behav Brain Res*, 241(0), 1-6.
- 720 Watanabe, T., & Sasaki, Y. (2015). Perceptual learning: toward a comprehensive theory. *Annu Rev*  
721 *Psychol*, 66, 197-221.
- 722 Watson, A. B., & Pelli, D. G. (1983). QUEST: a Bayesian adaptive psychometric method. *Percept*  
723 *Psychophys*, 33(2), 113-120.
- 724 Weiss, Y., Edelman, S., & Fahle, M. (1993). Models of Perceptual Learning in Vernier Hyperacuity.  
725 *Neural Computation*, 5(5), 695-718.

- 726 Yan, Y., Rasch, M. J., Chen, M., Xiang, X., Huang, M., Wu, S., & Li, W. (2014). Perceptual training  
727 continuously refines neuronal population codes in primary visual cortex. *Nat Neurosci*, *17*(10),  
728 1380-1387.
- 729 Yan, Y., Zhaoping, L., & Li, W. (2018). Bottom-up saliency and top-down learning in the primary  
730 visual cortex of monkeys. *Proc Natl Acad Sci U S A*, *115*(41), 10499-10504.
- 731 Yang, T., & Maunsell, J. H. (2004). The effect of perceptual learning on neuronal responses in monkey  
732 visual area V4. *J Neurosci*, *24*(7), 1617-1626.
- 733 Yu, Q., Zhang, P., Qiu, J., & Fang, F. (2016). Perceptual Learning of Contrast Detection in the Human  
734 Lateral Geniculate Nucleus. *Curr Biol*, *26*(23), 3176-3182.
- 735 Zaehle, T., Rach, S., & Herrmann, C. S. (2010). Transcranial alternating current stimulation enhances  
736 individual alpha activity in human EEG. *PLoS One*, *5*(11), e13766.
- 737 Zazio, A., Schreiber, M., Miniussi, C., & Bortoletto, M. (2020). Modelling the effects of ongoing alpha  
738 activity on visual perception: The oscillation-based probability of response. *Neurosci*  
739 *Biobehav Rev*, *112*, 242-253.
- 740 Zhang, P., Hou, F., Yan, F. F., Xi, J., Lin, B. R., Zhao, J., . . . Huang, C. B. (2018). High reward  
741 enhances perceptual learning. *J Vis*, *18*(8), 1-21.
- 742 Zhang, Y., Zhang, Y., Cai, P., Luo, H., & Fang, F. (2019). The causal role of alpha-oscillations in  
743 feature binding. *Proc Natl Acad Sci U S A*, *116*(34), 17023-17028.
- 744
- 745

746 **Table**

747 Table1 Demographic information of subjects

| Group   | Sample size | Female/Male | Mean age (SD) | Age range |
|---------|-------------|-------------|---------------|-----------|
| Group 1 | 17          | 13/4        | 22.35 (5.24)  | 18-37     |
| Group 2 | 17          | 11/6        | 21.47 (4.29)  | 18-34     |
| Group 3 | 18          | 11/7        | 20.50 (2.07)  | 18-24     |
| Group 4 | 18          | 12/6        | 23.83 (4.16)  | 19-37     |
| Group 5 | 17          | 11/6        | 22.00 (2.98)  | 18-28     |

748

749

750 **Figure Legends**

751 Figure 1. Stimuli, experimental protocol, and electrical stimulation protocol. (A)  
752 Schematic description of a 2AFC trial in a QUEST staircase for measuring orientation  
753 discrimination thresholds. Subjects were instructed to make a judgment of the  
754 orientation in the second interval relative to that in the first interval (clockwise or  
755 counter-clockwise), while gazing at the central fixation point. There was no feedback  
756 after each trial. (B) Experimental protocol. Subject underwent one pre-training test,  
757 five daily training sessions, and two post-training tests. The pre-training test (Pre) and  
758 post-training test 1 (Post1) and test 2 (Post2) took place on the days before,  
759 immediately after, and two months after training. The tACS was concurrently  
760 administered during each training session. (C) Electrical stimulation protocol and  
761 montage. TACS at different frequencies (10 Hz, 20 Hz, and 40 Hz) were applied over  
762 different cortical regions. For occipital stimulation groups, stimulation electrodes  
763 were positioned over the occipital cortex (O2) and the vertex (Cz), while for the  
764 sensorimotor stimulation group, stimulation electrodes were positioned over the  
765 sensorimotor regions of both hemispheres. The electrode positions were identified by  
766 the international 10-20 EEG system. The red square and blue square denoted the  
767 anodal electrode and cathodal electrode, respectively. These heads were generated by  
768 FaceGen Modeller (version 3.4).

769

770 Figure 2. Results of the main experiment in which visual cortex was stimulated using  
771 tACS at different frequencies. (A) Learning curves. Dots represent averaged  
772 thresholds across subjects at different test and training days, and lines represent fitted  
773 learning curves using a power function. (B) Learning rates. (C) Orientation  
774 discrimination thresholds at Pre and Post1. (D) Percent improvements in orientation

775 discrimination performance at Post1, relative to Pre.  $*p < .05$ ;  $**p < .01$ ;  $***p < .001$ .

776 Error bars denote the standard error of the mean (SEM) across subjects.

777

778 Figure 3. Retention of the learning effect. (A) Retest results two months after training  
779 for subjects in the 10 Hz occipital stimulation group and the sham occipital  
780 stimulation group. (B) Retest results 14 months after training for part of the subject  
781 cohort. Each red dot and black dot represent a single subject in the 10 Hz occipital  
782 stimulation group and the sham occipital stimulation group, respectively. The insets  
783 depict the mean thresholds for the 10 Hz occipital stimulation group (red and pink  
784 bars) and the sham occipital stimulation group (black and grey bars). Error bars  
785 denote the standard error of the mean (SEM) across QUEST staircases or subjects.

786

787 Figure 4. Results of the control experiment in which the 10 Hz tACS was applied to  
788 bilateral sensorimotor areas. (A) Learning curves. Dots represent averaged thresholds  
789 across subjects at different test and training days, and lines represent fitted learning  
790 curves using a power function. (B) Learning rates. (C) Orientation discrimination  
791 thresholds at Pre and Post1. (D) Percent improvements in orientation discrimination  
792 performance at Post1, relative to Pre.  $***p < .001$ . Error bars denote the standard  
793 error of the mean (SEM) across subjects.

794

795

796 **Figure 1**

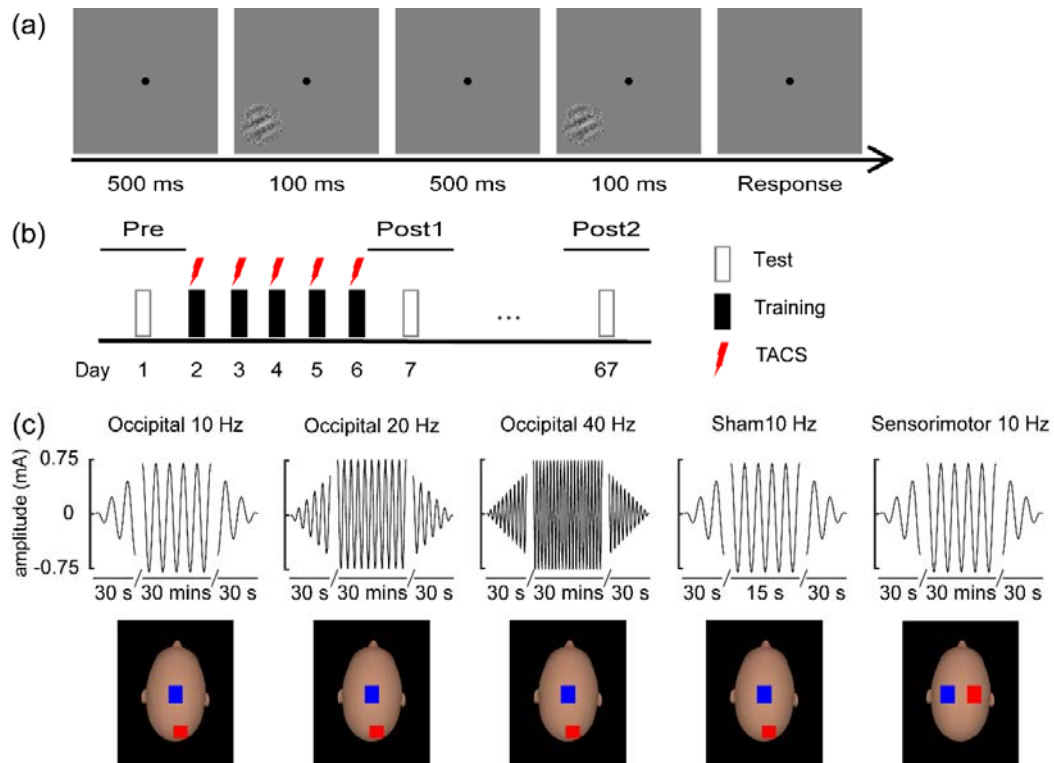

797

798



799 **Figure 2**

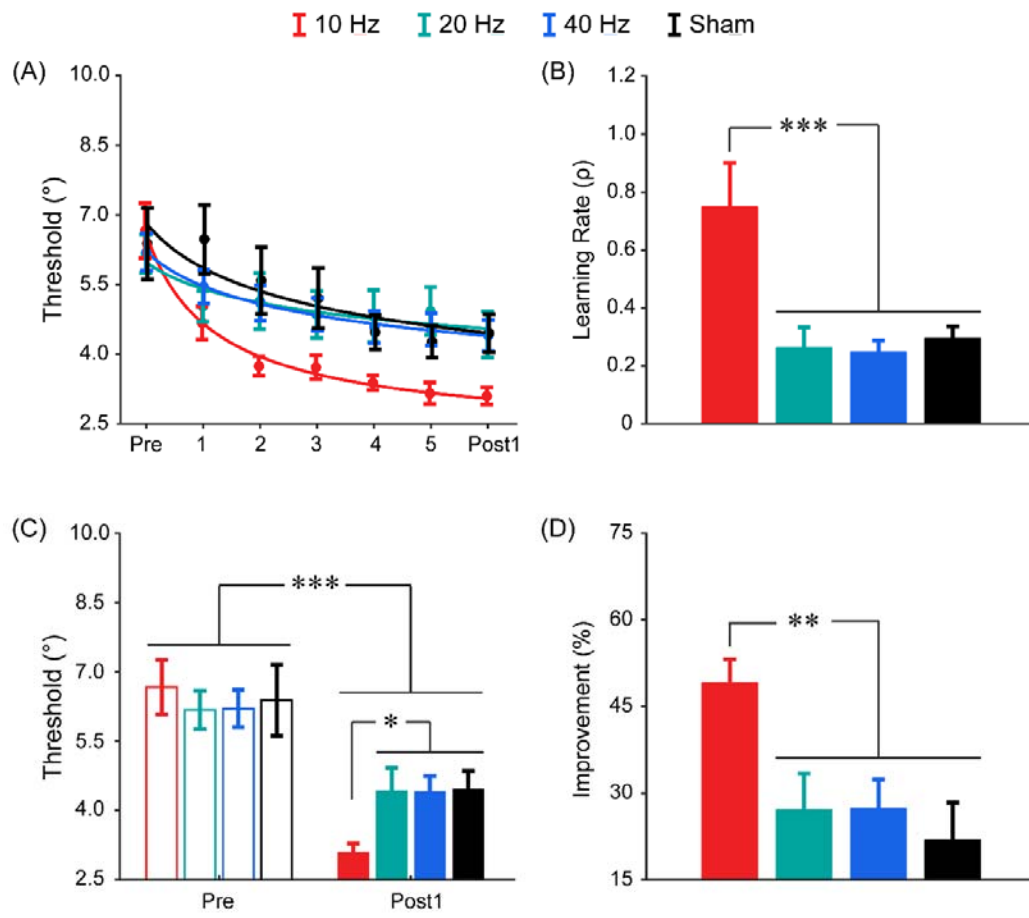

800

801

802 **Figure 3**

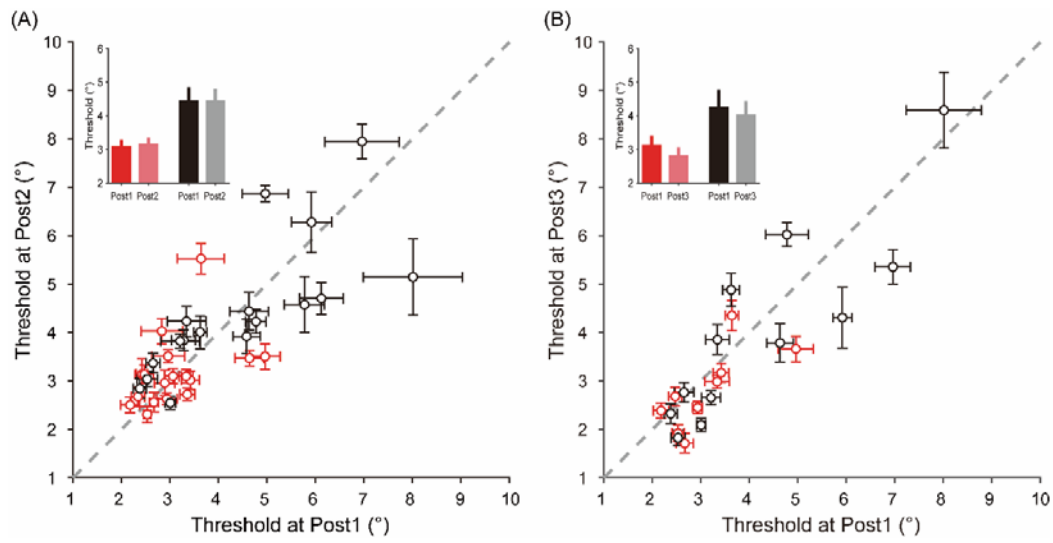

803

804

805 **Figure 4**

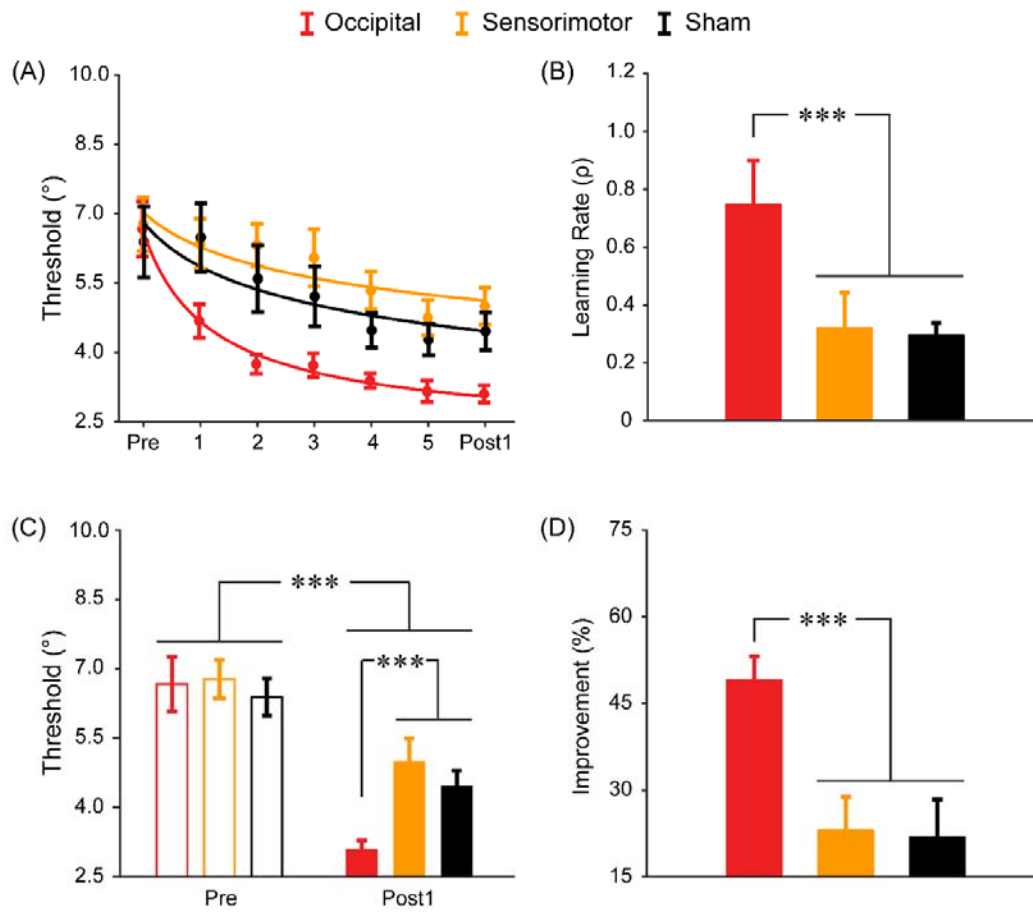

806
